# Supplementary material for: Distinct patterns of phosphatidylserine localization within the Rab11a-containing recycling system
Source: PubMed Central journal article supplement — Cell Logist. 2014 Apr 3;4:e28680. doi: 10.4161/cl.28680 (PMC4156484; doi:10.4161/cl.28680), 2014-04-03
Supplement: cl-4-e28680-s02.pdf [file cl-4-e28680-s02.pdf]

## **Supplemental Material to:**

**Nicholas W. Baetz, James R. Golding**

**Distinct patterns of phosphatidylserine localization  
within the Rab11a-containing recycling system**

**Cellular Logistics 2014; 4(1)**

**<http://dx.doi.org/10.4161/cl.28680>**

**[http://www.landesbioscience.com/journals/cellularlogistics/  
article/28680/](http://www.landesbioscience.com/journals/cellularlogistics/article/28680/)**

Supplemental Figure (S1): in this packet

Supplemental Video Legends for SV1, SV2, SV3: in this packet

Supplemental Video (SV1): <http://www.landesbioscience.com/journals/cellularlogistics/article/28680-SV1.mov>

Supplemental Video (SV2): <http://www.landesbioscience.com/journals/cellularlogistics/article/28680-SV2.mov>

Supplemental Video (SV3): <http://www.landesbioscience.com/journals/cellularlogistics/article/28680-SV3.mov>

## A. +Triton-X

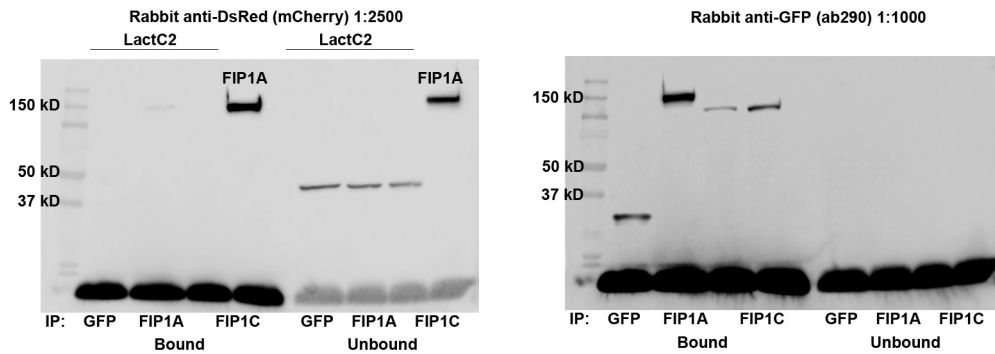

## B. -Triton-X

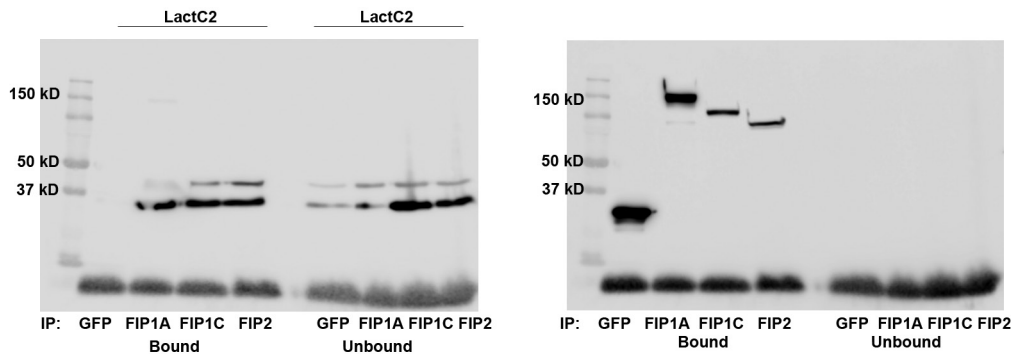

**Supplemental Figure S1.** The mCherry-LactC2 is isolated with EGFP-Rab11-FIPs in the presence of intact membranes. Lysates from HEK cells expressing mCherry-LactC2 and EGFP-Rab11-FIPs (FIP1A, FIP1C, or FIP2) were analyzed by western blot for recovered mCherry-LactC2 following isolation of EGFP-Rab11-FIPs in the presence and absence of detergent. mCherry-LactC2 was recovered while membranes were left intact, but introduction of detergent caused a loss of recovered LactC2 bound to EGFP-Rab11-FIPs.

## Supplemental Video Legends

**Supplemental Video SV1.** EGFP-LactC2 and mCherry-Rab11a coordinated movement in live HeLa cells. HeLa cells transfected with EGFP-LactC2 were analyzed by time-lapse deconvolution microscopy. Frames were taken at least every 2 seconds for at least 1 minute and the display rates were set to 3 frames per second. Representative still images are presented in Figure 1. Panels from left to right: EGFP-LactC2, mCherry-Rab11a, and Merged.

**Supplemental Video SV2.** EGFP-Rab11-FIP1A and mCherry-LactC2 movement in live HeLa cells. HeLa cells transfected with EGFP-Rab11-FIP1A and mCherry-LactC2 were studied using time-lapse deconvolution microscopy. Frames were taken at least every 2 seconds for at least 1 minute and the display rates were set to 3 frames per second. Representative still images are presented in Figure 2. Panels from left to right: EGFP-Rab11-FIP1A, mCherry-LactC2, and Merged.

**Supplemental Video SV3.** Cerulean-Rab11-FIP3, Venus-Rab11-FIP1A, and mCherry-LactC2 movement in live HeLa cells. HeLa cells transfected with Cerulean-Rab11-FIP3, Venus-Rab11-FIP1A and mCherry-LactC2 were analyzed by time-lapse deconvolution microscopy. Frames were taken at least every 3 seconds for at least 1 minute and the display rates are set to 3 frames per second. Representative still images are presented in Figure 6. Panels (top-left to bottom-right): Cerulean-Rab11-FIP3, Venus-FIP1A, mCherry-LactC2, Venus-FIP1A and mCherry-LactC2, Cerulean-Rab11-FIP3 and mCherry-LactC2, and Merged.
